1 Respiratory heterogeneity shapes biofilm formation and host colonization in  
2 uropathogenic *Escherichia coli*

3

4 Running title: Respiratory heterogeneity in uropathogenic *Escherichia coli*

5

6 Connor J. Beebout,<sup>a</sup> Allison R. Eberly,<sup>a</sup> Sabrina H. Werby,<sup>b</sup> Seth A. Reasoner,<sup>a</sup> John R.  
7 Brannon,<sup>a</sup> Shuvro De,<sup>c</sup> Madison J. Fitzgerald,<sup>d</sup> Marissa M. Huggins,<sup>d</sup> Douglass B.  
8 Clayton,<sup>c</sup> Lynette Cegelski,<sup>b</sup> and Maria Hadjifrangiskou<sup>a,e,#</sup>

9

10 <sup>a</sup>Department of Pathology, Microbiology, and Immunology, Vanderbilt University  
11 Medical Center, Nashville, TN, USA

12 <sup>b</sup>Department of Chemistry, Stanford University, Stanford, CA, USA

13 <sup>c</sup>Division of Pediatric Urology, Vanderbilt University Medical Center, Nashville, TN, USA

14 <sup>d</sup>Vanderbilt University, Nashville, TN, USA

15 <sup>e</sup>Vanderbilt Institute for Infection, Immunology & Inflammation, Vanderbilt University  
16 Medical Center, Nashville, TN, USA

17

18 #Address correspondence to: maria.hadjifrangiskou@vumc.org, @BacterialTalk

19

## 20 **Abstract**

21 Biofilms are multicellular bacterial communities encased in a self-secreted extracellular  
22 matrix comprised of polysaccharides, proteinaceous fibers, and DNA. Organization of  
23 these components lends spatial organization to the biofilm community such that biofilm  
24 residents can benefit from the production of common goods, while being protected from  
25 exogenous insults. Spatial organization is driven by the presence of chemical gradients,  
26 such as oxygen. Here we quantified and localized the expression of two *Escherichia coli*  
27 cytochrome oxidases in cells found in the biofilm state and defined their contribution to  
28 biofilm architecture. These studies elucidated a role for the high-affinity quinol oxidase  
29 cytochrome *bd* in matrix production and biofilm resident protection. Cytochrome *bd* was  
30 the most abundantly expressed respiratory complex in the biofilm community and was  
31 localized in the biofilm interior. Depletion of the cytochrome *bd*-expressing  
32 subpopulation led to decreased extracellular matrix and increased sensitivity of the  
33 community to exogenous stresses. Interrogation of the distribution of cytochrome  
34 oxidases in the planktonic state revealed that ~15% of the population expresses  
35 cytochrome *bd* at atmospheric oxygen concentration, and this population dominates  
36 during acute urinary tract infection. These data point towards a bet-hedging mechanism  
37 in which heterogeneous expression of respiratory complexes ensures respiratory  
38 plasticity of *E. coli* across diverse host niches.

39

## 40 **Keywords**

41 biofilms, heterogeneity, oxygen gradients, respiration, urinary tract infection

## 42 **Importance**

43 Biofilms are multicellular bacterial communities encased in a self-secreted extracellular  
44 matrix comprised of polysaccharides, proteinaceous fibers, and DNA. Organization of  
45 these components lends spatial organization in the biofilm community. Here we  
46 demonstrate that oxygen gradients in uropathogenic *Escherichia coli* (UPEC) biofilms  
47 lead to spatially distinct expression programs for cytochrome oxidases – components of  
48 the terminal electron transport chain. Our studies reveal that the cytochrome *bd*-  
49 expressing subpopulation is critical for biofilm development and matrix production. In  
50 addition, we show that cytochrome oxidases are also heterogeneously expressed in  
51 planktonic populations, and that this respiratory heterogeneity provides a fitness  
52 advantage during infection. These studies define the contributions of cytochrome  
53 oxidases to biofilm physiology and suggest the presence of respiratory bet-hedging  
54 behavior in UPEC.

55

## 56 **Introduction**

57 Rather than existing as a phenotypically uniform population, bacterial  
58 communities are characterized by subpopulations that are oftentimes phenotypically  
59 distinct. This intra-strain heterogeneity can be transient, brought about by stochastic  
60 differences in the abundance and activity of regulators in each individual cell, or it can  
61 be irreversible, through the acquisition of mutations. Heterogeneity influences the fate of  
62 the particular strain by allowing for at least a portion of the population to thrive in  
63 different niches as a result of its specific expression program.

64 Biofilms are complex multicellular communities assembled in an organized  
65 fashion in three-dimensional space. One of the most critical features of biofilms is a self-  
66 secreted extracellular matrix (ECM) that comprises a variety of exopolysaccharides,  
67 proteinaceous fibers, and extracellular DNA (1). The ECM protects the biofilm residents  
68 from predation, desiccation, assault by antimicrobial agents, and, when biofilms form in  
69 the host, the immune system. In addition to providing a physical barrier against external  
70 threats, the ECM also serves as a barrier to diffusion. Restricted diffusion, in  
71 conjunction with the metabolic activity of resident bacteria, leads to the establishment of  
72 various chemical gradients throughout the biofilm community (2, 3). Bacteria at different  
73 locales along the gradient respond to the microenvironment differently, and as a result  
74 differentiate into distinct and often metabolically cooperative subpopulations (3-7).  
75 Previous studies in *Pseudomonas aeruginosa* and *Escherichia coli* indicated that  
76 oxygen gradients play a key role in regulating the differential expression of genes  
77 involved in biofilm formation and metabolic specialization (8-11). The presence of an  
78 oxygen gradient suggests the emergence of subpopulations that utilize different  
79 respiratory components as a function of the oxygen abundance to which they are  
80 exposed. This leads to the hypothesis that the metabolic program of differentially  
81 respiring subpopulations is distinct from one another and contributes to differential  
82 production of biofilm goods that in turn enhance biofilm resilience.

83 *Escherichia coli* is a facultative anaerobe capable of utilizing multiple metabolic  
84 pathways to fulfill its energy requirements. In aerobically respiring *E. coli*, cytochrome  
85 oxidases comprise essential components of the terminal electron transport chain that  
86 couple the flow of electrons to the reduction of molecular oxygen into water (12, 13). *E.*

87 *coli* encodes two classes of cytochrome oxidases with differing oxygen affinities: one  
88 heme copper oxidase, cytochrome *bo* (encoded by the *cyoABCD* gene cluster), and two  
89 *bd*-type oxidases, cytochromes *bd* (*cydABX*) and *bd<sub>2</sub>* (*appBC*) (13, 14). Cytochrome *bo*  
90 is induced at high (atmospheric, 21%) oxygen tensions, whereas the *bd*-type oxidases  
91 are induced at low (hypoxic, 2-15%) oxygen tensions (13, 15). Based on these *in vitro*  
92 expression patterns, we hypothesized that cytochrome *bo* would be enriched on the air-  
93 exposed biofilm surface, whereas cytochromes *bd* and *bd<sub>2</sub>* would be enriched in the  
94 hypoxic interior.

95         Here we report that the spatial distribution of cytochrome oxidases in biofilms  
96 formed by uropathogenic *Escherichia coli* (UPEC) is a fundamental driver of biofilm  
97 architecture. Peptide nucleic acid fluorescence *in situ* hybridization (PNA-FISH)  
98 analyses assigned locations to each cytochrome-producing subpopulation, elucidating  
99 for the first time spatially distinct expression programs for respiratory oxidases in *E. coli*.  
100 Depletion of the cytochrome *bd*-expressing subpopulation from the biofilm significantly  
101 impaired diffusion resistance by altering the abundance and organization of the ECM.  
102 Assessment of deletion mutants in a well-established urinary tract infection murine  
103 model revealed that only the cytochrome *bd* mutant was significantly attenuated for  
104 virulence, although the infecting pool of bacteria in the parent strain exhibited  
105 heterogeneous expression of all three respiratory oxidases. *In situ* analysis of urine-  
106 associated bacteria demonstrated a shift of the population to cytochrome *bd* expression,  
107 suggesting that the bladder favors cytochrome *bd*-expressing bacteria and that  
108 heterogeneity in the input pool provides a fitness advantage to uropathogenic strains.  
109 Our studies, performed on one of the most commonly acquired human pathogens and a

110 prolific biofilm producer *in vivo*, unveil a potential avenue for targeting heterogeneity and  
111 homogenizing bacterial programming as a therapeutic approach.

112

## 113 **Results**

### 114 *Cytochrome bd is the most abundant respiratory transcript in mature UPEC biofilms*

115 To test the hypothesis that multiple differentially respiring subpopulations exist in *E. coli*  
116 biofilms, we measured the relative expression of components of the aerobic (*cyoABCD*,  
117 *appBC*, and *cydABX*) and anaerobic (*napABC* and *narGHI*) respiratory chains in mature  
118 colony biofilms. Previous studies demonstrated that the central and peripheral regions  
119 of biofilms are metabolically distinct, yet co-dependent (16). The central region is  
120 shielded from environmental stressors and is therefore critical for survival of the  
121 population. The peripheral region contains a rapidly expanding population that  
122 contributes most to biofilm growth at the expense of being highly susceptible to  
123 exogenous threats. We first analyzed transcript levels in the center and periphery of  
124 colony biofilms grown on Yeast Extract/Casamino Acids (YESCA) agar (Fig. 1a), a  
125 medium which induces expression of key matrix components (curli amyloid fibers, type  
126 1 pili, secreted proteins Hu- $\alpha/\beta$ , cellulose) that are also critical for fitness in the urinary  
127 tract (10, 17-19). At both regions, of the five respiratory operons analyzed, over 90  
128 percent of transcripts corresponded to aerobic respiratory components (Fig. 1b-c). The  
129 most abundant transcript was that of *cydA* (Fig. 1b-d), corresponding to cytochrome *bd*  
130 complex (*cydABX*) expression. The *cydA* transcript levels were approximately 2-fold  
131 higher than those corresponding to *cyoABCD* (Fig. 1b-d), which was the second most  
132 highly abundant oxidase under the conditions tested. Cytochrome *bd*<sub>2</sub> was the third

133 most-highly expressed, while the anaerobic *narG* and *napA* genes exhibited baseline  
134 expression levels (Fig. 1b-d). These results validated that most of the biofilm is hypoxic,  
135 consistent with previous work in *P. aeruginosa* and *E. coli* (8, 9).

136

### 137 *Spatial organization of cytochrome expression along the oxygen gradient*

138 Previous studies elucidated the presence of steep biofilm oxygen gradients as a  
139 function of biofilm depth (Fig. 2a) (8, 9). To define the spatial distribution of cytochrome-  
140 expressing subpopulations, we performed PNA-FISH on cryosections of mature colony  
141 biofilms using probes targeting each cytochrome oxidase operon (*cyoA*, *appC*, and  
142 *cydA*) as well as *rrsH* as an endogenous control. Each PNA-FISH probe was designed  
143 using the validated probe sequences used for qPCR (Fig. 1 and Table S1) to ensure  
144 comparable hybridization efficiencies for each probe. SYTO 9 staining of sections was  
145 used as an additional control to localize the entire biofilm community and account for  
146 possible hybridization inconsistencies with the *rrsH* control probe (Figs. 2d, j and S1).  
147 Consistent with previous observations demonstrating that the highest oxygen  
148 abundance is at the air-exposed surface of the biomass (8, 9), we observed that  
149 *cyoABCD* transcript was most abundant in bacteria lining the air-exposed surface of the  
150 biofilm (Fig. 2b-c, f, h-i, l, n). In contrast, the highest abundance of *cydABX* transcript  
151 was found in densely packed clusters of bacteria in the interior of the biofilm (Fig. 2b-c,  
152 e, g, i, k, m). Interestingly, while in K12 *E. coli* the function of cytochrome *bd* and *bd<sub>2</sub>* are  
153 thought to be redundant, the expression distribution of the two gene clusters was  
154 different, with *appBC* observed to be evenly distributed throughout the community (Fig.  
155 S1).

156

157 Loss of cytochrome *bd* alters biofilm architecture, development, and matrix abundance

158         The highly regulated spatial expression of cytochrome *bo* and cytochrome *bd*  
159 oxidases in the biofilm raised the hypothesis that each of these cytochrome-expressing  
160 subpopulations uniquely contributes to overall biofilm architecture. To test this  
161 hypothesis, we created isogenic deletion mutants lacking the *cyoAB*, *appBC*, or *cydAB*  
162 genes and compared the biofilms formed by the resulting strains (Fig. 3a). Colony  
163 biofilms formed by the parental strain expand to an average diameter of 16.8 mm over  
164 an 11-day incubation period and exhibit elaborate rugose architecture with distinct  
165 central and peripheral regions (Figs. 3a and S2). Strains deleted for *cyoAB* and *appBC*  
166 exhibited inverse phenotypes to each other, with the  $\Delta$ *cyoAB* colony biofilms expanding  
167 more than the parental strain (average diameter: 19.9 mm) and the  $\Delta$ *appBC* colony  
168 biofilms appearing more compact and with apparently higher rugosity (Figs. 3a and S2).  
169 Strikingly, while  $\Delta$ *cyoAB* and  $\Delta$ *appBC* only displayed minor architectural changes,  
170  $\Delta$ *cydAB* colony biofilms exhibited pronounced defects both in development and  
171 architecture (Fig. 3a and S2). Colonies deleted for *cydAB* grew at a similar rate as the  
172 parent,  $\Delta$ *cyoAB*, and  $\Delta$ *appBC* for the first 72 hours (Fig. S2). However, colony growth  
173 was significantly stunted between days 3 and 11, with radial expansion remaining at an  
174 average diameter of 10.3 mm and colonies exhibiting a wet mass of 48.11 mg (70% of  
175 the parent strain) at the end of the experiment, even though the CFU produced by the  
176 two strains were comparable across the 11-day incubation period (Figs. 3b-c and S2).  
177 Complementation of  $\Delta$ *cydAB* with an extra-chromosomal construct expressing *cydABX*  
178 under its native promoter rescued the deletion phenotype, indicating that the defects



179 observed in the  $\Delta cydAB$  mutant stem solely from the removal of the *cydABX* cluster  
180 (Fig. S3). Together, these observations demonstrate that cytochrome *bd* is a key  
181 contributor to biofilm development and suggest that loss of *cydAB* alters the synthesis  
182 and organization of the ECM.

183 Under the conditions used, the ECM of *E. coli* comprises primarily of cellulose  
184 and curli amyloid fibers (20). Previous solid-state nuclear magnetic resonance (NMR)  
185 spectroscopy analyses on intact ECM material defined the contributions of cellulose and  
186 curli to the *E. coli* biofilm ECM, and determined that curli and cellulose are present in a  
187 6 to 1 ratio (20). More recently, the ECM cellulose was determined to be a chemically  
188 modified form of cellulose, specifically phosphoethanolamine (pEtN) cellulose (21). To  
189 interrogate the effects of *cydAB* deletion on curli and exopolysaccharide production, we  
190 extracted ECM and performed solid-state NMR analysis to evaluate the abundance of  
191 curli and cellulose components (Fig. 3d-e). The NMR spectra obtained for the parent  
192 and  $\Delta cydAB$  ECM are very similar overall, indicating a comparable protein to  
193 polysaccharide ratio between the samples (Fig. 3d). Consistent with this analysis, we  
194 observe no change in protein composition between the parent and  $\Delta cydAB$  ECM  
195 samples when analyzed on SDS-PAGE gels (Fig. 3e). We additionally do not observe  
196 any overt alterations to curli abundance or localization between UTI89 and  $\Delta cydAB$   
197 biofilm cryosections using immunofluorescence (Fig. 3f). Despite the similar  
198 composition, the total amount of ECM recovered was reduced in  $\Delta cydAB$ , indicative of a  
199 decrease in ECM production. Because the protein to polysaccharide ratio and curli  
200 abundance are unchanged between the parent and  $\Delta cydAB$ , these data are suggestive

201 of a change to the overall mixture of matrix components in  $\Delta cydAB$ , with particular  
202 reductions in the abundance of non-curli and non-pEtN cellulose ECM components.

203 The ECM plays a central role in biofilm physiology by providing physical  
204 protection against exogenous insults, serving as a structural scaffold, and helping to  
205 establish chemical gradients which lead to metabolic differentiation and subpopulation  
206 formation (2, 3, 17, 22). As such, disruptions to the matrix can have catastrophic  
207 consequences for the biofilm community. We hypothesized that the altered matrix  
208 abundance and architecture in the  $\Delta cydAB$  mutant would render the biofilm more  
209 susceptible to exogenous insults. To investigate this possibility, we probed the barrier  
210 function of the cytochrome oxidase mutant biofilms by applying a drop of colored water  
211 to the surface of mature colony biofilms (Fig. 3g and Movies S1-4) (23). While the  
212 parent strain,  $\Delta cyoAB$ , and  $\Delta appBC$  biofilms repelled the drop, the solution readily  
213 penetrated  $\Delta cydAB$  biofilms, demonstrating that the alterations to  $\Delta cydAB$  biofilm  
214 architecture and matrix abundance increases penetrance of aqueous solutions.

215

216 *Loss of cytochrome *bd* increases population sensitivity to nitrosative stress under*  
217 *ambient oxygen concentrations*

218 Together, our studies indicate that cytochrome *bd* is highly expressed in biofilms,  
219 and that loss of the cytochrome *bd*-expressing subpopulation impairs barrier function  
220 and reduces the abundance of extracellular matrix. These data suggest that the  
221 cytochrome *bd*-expressing subpopulation plays a critical role in promoting ECM  
222 synthesis and providing structural integrity to the community. However, it is also

223 possible that cytochrome *bd* is preferentially expressed in the biofilm because  
224 cytochrome *bd* provides protection against oxidative and nitrosative stress – byproducts  
225 of biofilm metabolism (24, 25) and, in the case of infection, components of the innate  
226 immune response (26-28). Previous studies demonstrated that cytochrome *bd* has  
227 catalase activity, is capable of oxidizing the respiratory inhibitor nitric oxide, and is  
228 insensitive to nitrosative stress due to its unusually fast nitric oxide dissociation rate  
229 (26). These biochemical activities are thought to occur at unique locations on the  
230 protein; quinol oxidation occurs at the periplasmic Q loop, oxygen reduction and nitric  
231 oxide binding occurs at heme *d*, and catalase activity is thought to occur through heme  
232 *b*<sub>595</sub> (14, 29, 30). By contrast, cytochrome *bo* affords no protection against oxidative or  
233 nitrosative stress and is irreversibly inhibited by nitric oxide (26). Given these additional  
234 functions of cytochrome *bd*, we performed growth curves at ambient oxygen  
235 concentration and evaluated the effects of nitrosative and oxidative stress on the fitness  
236 of cells lacking *cydAB* or *cyoAB* as compared to the parent strain. Without the addition  
237 of stress, both mutants exhibited a lag in growth (Fig. 4a), but each reached a maximal  
238 CFU/mL similar to the parental strain by the end of the growth experiment (Fig. 4a).  
239 ATP measurements of the corresponding cultures revealed no significant overall  
240 differences in ATP concentrations between the strains during logarithmic growth (Fig.  
241 4b). Next, to determine whether loss of cytochrome *bd* impairs resistance to oxidative  
242 and nitrosative stress, we measured growth with and without these stressors. Whereas  
243 treatment with H<sub>2</sub>O<sub>2</sub> had no significant effects on the growth of the two mutants (Fig.  
244 4c), addition of the nitric oxide donor NOC-12 to planktonic cultures most significantly  
245 impacted growth of  $\Delta$ *cydAB* (Fig. 4d), consistent with previous studies on K12 *E. coli*

246 and the multi-drug resistant strain ST131 (27, 28). Together, these data demonstrate  
247 that while cytochrome *bd* is dispensable for energy generation during planktonic growth,  
248 loss of cytochrome *bd* sensitizes bacteria to nitrosative stress. In conjunction with the  
249 disrupted biofilm architecture and altered matrix abundance in  $\Delta cydAB$  biofilms, these  
250 data suggest that cytochrome *bd*-expressing subpopulations are critical, not only for  
251 directing matrix biosynthesis, but also for withstanding harmful metabolic byproducts  
252 while in the biofilm state.

253

#### 254 *Heterogeneous expression of cytochrome oxidases at the population level*

255 Our data thus far indicate that in addition to heterogeneity in cytochrome oxidase  
256 expression in the biofilm state, heterogeneous expression of cytochrome oxidases must  
257 also be occurring in the planktonic population. Our planktonic studies revealed a lag in  
258 growth of the  $\Delta cyoAB$  and the  $\Delta cydAB$  mutants when these strains were grown under  
259 ambient oxygen concentrations, suggesting that in a given culture there are  
260 subpopulations – like in the biofilm – that stochastically or deterministically express  
261 different respiratory components. Such a bet-hedging approach could provide UPEC  
262 with the flexibility to quickly adapt to a given niche, be it different locales in the  
263 genitourinary tract or in the gastrointestinal tract during host colonization. In the context  
264 of urinary tract infection, *E. coli* traverse from the nearly anoxic gut to the perineum,  
265 where it encounters atmospheric oxygen concentrations, prior to ascending the urethra  
266 to enter the hypoxic bladder, where the dissolved urinary oxygen concentration is 4 –  
267 6% (31). This microbial journey is performed by planktonic cells, which can then expand

268 into multicellular communities on and within bladder epithelial cells, as well as on  
269 urinary catheters (1, 32). In previous studies, we and others demonstrated that UPEC  
270 respire aerobically during infection (33-35) and that biofilm formation is favored in  
271 conditions that mimic oxygen levels in the bladder (36).

272         The high abundance of *cydABX* transcript in the hypoxic areas of the biofilm, in  
273 conjunction with the defects observed in aerobically grown  $\Delta$ *cydAB* planktonic cultures,  
274 raised the hypothesis that a cytochrome *bd*-expressing subpopulation exists in the  
275 planktonic state under ambient oxygen conditions and that this cytochrome *bd*-  
276 expressing subpopulation exhibits the greatest fitness advantage during infection. To  
277 test this hypothesis, we first analyzed transcript abundance in cultures used for  
278 inoculation during murine infections with qPCR and PNA-FISH (Fig. 5). Under these  
279 conditions, qPCR analysis indicated that the majority of transcript corresponds to  
280 *cyoABCD* (69.7%), with *cydABX* and *appBC* transcripts each comprising approximately  
281 15% of detected transcripts (Fig. 5a). Transcript abundance was altered by decreasing  
282 ambient oxygen concentrations, with the most abundant transcript corresponding to  
283 *cydABX* in 12%, 8% and 4% oxygen, the latter being the concentration of dissolved  
284 oxygen concentration in the urine (Figs. 5a-b and S4) (31). PNA-FISH analysis revealed  
285 the presence of bacteria which uniquely express cytochrome *bo* (Fig. 5f), *bd* (Fig. 5e),  
286 or *bd<sub>2</sub>* (Fig. 5g), as well as some cells that have transcript of all three operons (Fig. 5c,  
287 e-g). Intriguingly, we observed dividing cells in which each daughter had distinct  
288 cytochrome oxidase transcript abundance (Fig. 5c, inset), suggesting that asymmetric  
289 distribution of respiratory transcripts during division may be a mechanism by which  
290 these subpopulations are generated.

291

292 *Expression of cytochrome *bd* is dominant during acute urinary tract infection*

293 Previous studies reported that deletion of cytochrome *bd* impairs UPEC virulence  
294 in a UTI model (28). To gauge the contribution of each cytochrome oxidase during  
295 infection, we evaluated the fitness of  $\Delta cyoAB$ ,  $\Delta appBC$ , and  $\Delta cydAB$  mutants compared  
296 to the parent strain in a murine model of acute urinary tract infection. Consistent with the  
297 previous report (28),  $\Delta cydAB$  exhibited a ~2 log decrease in bladder colonization by 24  
298 hours relative to the parent strain, while the mutants deleted for *cyoAB* and *appBC*  
299 colonize mice at the same level as the parent strain (Fig. 5m). Subsequent PNA-FISH  
300 on pooled urine obtained from mice infected with the parent strain revealed a marked  
301 enrichment in cytochrome *bd*-expressing cells and a corresponding reduction in the  
302 number of cells expressing cytochrome *bo* (Fig. 5h-l). This suggests that the bladder  
303 environment either induces transcription of *cydABX* or that only subpopulations of  
304 bacteria expressing *cydABX* are capable of efficiently colonizing the bladder. Together  
305 these data reveal the presence of subpopulations of bacteria that differentially express  
306 cytochrome oxidases as a potential bet-hedging mechanism to promote bladder  
307 colonization.

308

309 **Discussion**

310 Cytochrome *bd* is a multifunctional protein that is central to respiration and can  
311 maintain activity in the face of nitrosative stress (26). As such, bacteria expressing  
312 cytochrome *bd* presumably exhibit a fitness advantage during growth conditions that are

313 low in oxygen or high in metabolic byproducts that increase nitric oxide concentration.  
314 The biofilm state, while protecting the bacterial residents from predation and  
315 desiccation, constitutes a high-density environment with several chemical gradients that  
316 result from the consumption and production of metabolites. Accordingly, expressing an  
317 enzyme that can facilitate tolerance to metabolic byproducts, such as nitric oxide, would  
318 ensure that biofilm residents do not perish as a consequence of their own metabolic  
319 excretions. Our study elucidates the distribution of cytochrome oxidase expression in  
320 the biofilm state and indicates that the bulk of biofilm residents express cytochrome *bd*,  
321 particularly in the densely populated interior. The cytochrome *bd*-expressing bacteria  
322 are not necessarily using cytochrome *bd* for respiration, as many of them also have low  
323 levels of cytochrome *bo* and *bd<sub>2</sub>* transcripts (Fig. 2 and S1). Rather, the production of  
324 cytochrome *bd* may be leveraged towards providing tolerance to nitrosative stress,  
325 which irreversibly inhibits cytochrome *bo*. Indeed, in  $\Delta$ *cydAB* biofilms we observe a  
326 marked increase in cytochrome *bo* expression (Fig. S5), suggesting that loss of  
327 cytochrome *bd* impairs nitric oxide tolerance and that increased production of  
328 cytochrome *bo* may be a compensatory mechanism that allows biofilm bacteria to  
329 respire in the presence of high levels of nitric oxide.

330 In addition to acting as a respiratory inhibitor, nitric oxide regulates cyclic di-GMP  
331 abundance and thereby governs the switch from motility to aggregation and biofilm  
332 expansion (37, 38). Consequently, if cytochrome *bd* decreases nitric oxide availability, it  
333 would indirectly influence ECM production. Consistent with this hypothesis, loss of the  
334 cytochrome *bd*-expressing subpopulation reduces the total abundance of matrix  
335 components and leads to gross alterations of biofilm architecture (Fig. 3). It is thus

336 possible that the cytochrome *bd*-expressing subpopulation is critical for promoting the  
337 biosynthesis of the ECM by influencing the nitric oxide – cyclic di-GMP signaling axis.  
338 We are currently investigating this possibility.

339 Most importantly, this work revealed the presence of planktonic subpopulations  
340 that express distinct cytochrome oxidases during growth. In conjunction with the  
341 observation that only cytochrome *bd* expression is critical for fitness during infection,  
342 this finding suggests that basal expression of cytochrome *bd* under aerobic conditions  
343 serves as a bet-hedging mechanism that promotes the expansion of bacteria during the  
344 transition from the aerobic perineum to the hypoxic bladder. In addition to allowing for  
345 efficient respiration in the hypoxic bladder, expression of cytochrome *bd* provides  
346 resistance against nitrosative stress – a metabolic byproduct and component of the  
347 innate immune response – and promotes the formation of resilient biofilm communities.  
348 These observations suggest the presence of respiratory bet-hedging behavior in UPEC,  
349 and additionally suggest the possibility of targeting heterogeneity as a method for  
350 homogenizing bacterial populations and impeding their ability to colonize the urinary  
351 tract.

352

## 353 **Materials and Methods**

### 354 Bacterial Strains

355 All studies were performed in *Escherichia coli* cystitis isolate UTI89 (39). All gene  
356 deletions ( $\Delta$ *cyoAB*,  $\Delta$ *appBC*, and  $\Delta$ *cydAB*) were performed using the  $\lambda$ -red  
357 recombinase system (40). Complementation constructs were created in plasmid



358 pTRC99a with *cydABX* under the control of its native promoter as previously described  
359 (41). Primers used for gene deletions and complementation plasmid construction are  
360 listed in Table S1.

361

### 362 Growth conditions

363 For all analyses, strains were propagated overnight at 37°C with shaking in Lysogeny  
364 broth (LB) (Fisher) at pH 7.4. To form colony biofilms, 10 µL of overnight culture was  
365 spotted onto 1.2x Yeast Extract/Casamino Acids (YESCA) agar (9) and allowed to grow  
366 at room temperature. Growth curves to assess tolerance to nitrosative or oxidative  
367 stress were performed in LB broth at 37°C with shaking, starting from an overnight  
368 culture normalized to optical density at 600 nm ( $OD_{600}$ ) = 0.05. At 2 hours post-  
369 inoculation, cultures were split into equal volumes and treated with 0.5 mM NOC-12, 1  
370 mM H<sub>2</sub>O<sub>2</sub>, or left unperturbed.  $OD_{600}$  and CFU per mL measurements were taken every  
371 hour for 8 hours.

372

### 373 RT-qPCR

374 RNA was extracted from day 11 colony biofilms or planktonic cultures using the RNeasy  
375 kit (Qiagen). RNA was DNase treated using Turbo DNase I (Invitrogen), and reverse  
376 transcribed using SuperScript III Reverse Transcriptase (Invitrogen). cDNA was  
377 amplified in an Applied Biosystems StepOne Plus Real-Time PCR machine using  
378 TaqMan MGB chemistry with the primers and probes listed in Table S1. All reactions  
379 were performed in triplicate with four different cDNA concentrations (100, 50, 25, or 12.5  
380 ng per reaction). Relative fold difference in transcript abundance was determined using

381 the  $\Delta\Delta C_T$  method (42) with target transcripts normalized to *gyrB* abundance from a total  
382 of 3 – 4 biological replicates.

383

384 Peptide nucleic acid fluorescence *in situ* hybridization (PNA-FISH)

385 Day 11 biofilms were flash frozen in Tissue-Tek O.C.T. compound (Electron Microscopy  
386 Sciences) and cryosectioned as described previously (5). The PNA-FISH hybridization  
387 protocol was adapted from Almeida *et al* (43). Biofilm cryosections were fixed in 4%  
388 paraformaldehyde (PFA) for 30 minutes at room temperature, then dehydrated for 10  
389 minutes in 50% ethanol. After dehydration, 100  $\mu$ L of hybridization solution (see below  
390 for details) was applied to the slides. All hybridizations were performed at 60°C for 30  
391 minutes. Next, slides were submerged in pre-warmed wash solution for 30 minutes,  
392 mounted using ProLong Diamond (ThermoFisher), and imaged using a Zeiss 710  
393 confocal laser scanning microscope (CLSM). For planktonic cells, 1 mL of culture was  
394 sedimented, fixed in 4% PFA, resuspended in 50% ethanol, incubated at -20°C for 30  
395 minutes, and resuspended in 100  $\mu$ L hybridization solution. After hybridization, cells  
396 were pelleted, resuspended in 500  $\mu$ L pre-warmed wash solution, and incubated at  
397 60°C for 30 minutes. Finally, cells were pelleted and resuspended in 100  $\mu$ L sterile  
398 water before being applied to microscope slides for imaging. Wash solution contained 5  
399 mM Tris-HCl pH 7.4, 15 mM NaCl, and 1% Triton X-100. Hybridization solution  
400 contained 10% w/v dextran sulfate, 30% formamide, 50 mM Tris-HCl pH 7.4, 10 mM  
401 NaCl, 5 mM EDTA, 0.1% Triton X-100, and 200 nM of each PNA-FISH probe. Probe  
402 sequences were based on the probes used for qPCR (efficiency of hybridization: *rrsH*:

403 81; *cydA*: 107; *cyoA*: 115; *appC*: 73) and were synthesized by PNA Bio (Newbury Park,  
404 CA).

405

#### 406 ATP measurements

407 ATP was quantified from mid-log (4 hours after subculture) planktonic cultures using  
408 Cell-Glo Titer kit (Promega). Cultures were normalized to  $OD_{600} = 0.5$ , pelleted, and  
409 resuspended in PBS. 50  $\mu$ L of bacterial suspension was mixed with an equal volume of  
410 Cell-Glo Titer reagent and incubated shaking at room temperature for 15 minutes. After  
411 incubation, luminescence was measured on a SpectraMax i3 plate reader (Molecular  
412 Devices). Luminescence was converted to concentration of ATP using a standard curve  
413 on the same plate.

414

#### 415 Extracellular matrix extraction

416 Extracellular matrix was extracted using established methods (20). Briefly, biofilms were  
417 grown on YESCA agar containing 25  $\mu$ g/mL Congo Red. After 60 hours, biofilms were  
418 homogenized in cold 10 mM Tris-HCl pH 7.4 using an Omni Tissue Homogenizer  
419 (motor speed 9) five times for one minute per cycle. Next, the homogenate was  
420 centrifuged three times for 10 minutes at 5,000g to remove cells. The supernatant was  
421 spiked with NaCl (final concentration 170mM) and centrifuged for one hour at 13,000g  
422 to pellet the matrix. The ECM pellet was washed in 10 mM Tris-HCl pH 7.4 with 4%  
423 SDS and incubated at room temperature rocking overnight. Next, the suspended ECM  
424 was centrifuged at 13,000g for one hour, resuspended in cold 10 mM Tris-HCl pH 7.4,

425 and centrifuged at 30,000g for 20 minutes. Pelleted ECM was resuspended in MQ water  
426 and flash frozen.

427

#### 428 Solid-state NMR Measurements

429 All NMR experiments were performed in an 89 mm bore 11.7T magnet using either an  
430 HCN Agilent probe with a DD2 console (Agilent Technologies) or a home-built four-  
431 frequency transmission line probe with a Varian console. Samples were spun at 7143  
432 Hz in either 36  $\mu$ L capacity 3.2 mm Zirconia rotors or thin-walled 5 mm outer diameter  
433 Zirconia rotors. The temperature was maintained at 5°C with an FTS chiller (FTS  
434 Thermal Products, SP Scientific, Warminster, PA) supplying nitrogen at -10°C. The field  
435 strength for  $^{13}\text{C}$  cross polarization was 50 kHz with a 10%  $^1\text{H}$  linear ramp centered at 57  
436 kHz. The CPMAS recycle time was 2 s for all experiments.  $^1\text{H}$  decoupling was  
437 performed with continuous wave decoupling.  $^{13}\text{C}$  chemical shifts were referenced to  
438 tetramethylsilane as 0 ppm using a solid adamantane sample at 38.5 ppm. The 15.6 mg  
439 wild-type  $^{13}\text{C}$  CPMAS spectrum was the result of 32,768 scans and the 8.3 mg mutant  
440 spectrum was the result of 100,000 scans. NMR spectra were processed with 80 Hz line  
441 broadening.

442

#### 443 SDS-PAGE gels

444 A portion of the lyophilized ECM sample used for solid-state NMR analysis was  
445 resuspended in 98% formic acid and vacuum centrifuged. The samples were then  
446 reconstituted in SDS-PAGE sample buffer containing 8M urea and 50 mM DTT and  
447 further diluted to desired concentrations. All samples were centrifuged briefly at 10,000g

448 to remove any insoluble material and used for electrophoresis. The gels were stained  
449 with instant blue and de-stained in water.

450

#### 451 Immunofluorescence

452 Immunofluorescence targeting CsgA, the major curli subunit, was performed as  
453 previously described (10). Biofilm cryosections were fixed in 4% PFA for 30 minutes at  
454 room temperature and blocked overnight in 5% BSA at 4°C. Sections were washed in  
455 PBS, incubated with rabbit  $\alpha$ -CsgA antibodies (GenScript) (1:1000) at room temperature  
456 for 1 hour, washed in PBS, and incubated with AlexaFluor 647 goat  $\alpha$ -rabbit IgG  
457 (ThermoFisher) (1:1000) at room temperature for 1 hour. Slides were counterstained  
458 with SYTO 9 and imaged using CLSM.

459

#### 460 Murine infections

461 Murine infections were performed as described previously (44). In brief, UTI89 and each  
462 mutant strain were inoculated individually into 5 mL LB medium and grown shaking at  
463 37°C for 4 hours. Next, this culture was diluted 1:1000 into 10 mL fresh media and  
464 grown statically at 37°C for 24 hours. After 24 hours, this culture was diluted 1:1000 into  
465 10 mL fresh media and grown for another 24 hours at 37°C statically. Next, 7 – 8 week  
466 old C3H/HeN female mice were transurethrally inoculated with 50  $\mu$ L PBS containing  
467  $10^7$  CFU bacteria. Mice were sacrificed at 24 hours post infection after which bladders  
468 were removed and homogenized for CFU enumeration. All animal studies were  
469 approved by the Vanderbilt University Medical Center Institutional Animal Care and  
470 Use Committee (IACUC) (protocol number M/12/191) and carried out in accordance

471 with all recommendations in the Guide for the Care and Use of Laboratory Animals of  
472 the National Institutes of Health and the IACUC.

473

#### 474 Statistical analysis

475 All statistical analyses were performed in GraphPad Prism using the most appropriate  
476 test. Details of test used, error bars, and statistical significance cutoffs are presented in  
477 figure legends.

478

#### 479 **Acknowledgments**

480 We thank Dr. Jonathan Schmitz, Dr. Gerald Van Horn, Dr. Mariana X. Byndloss, and  
481 members of the Hadjifrangiskou laboratory for critical evaluation of the manuscript and  
482 helpful discussions. This work was supported by the following NIH grants: R01  
483 AI107052 (MH), DiaComp DK076169 (MH), T32 GM007347 (CJB), K08 DK106472  
484 (DBC) and the Vanderbilt University Medical Center Pediatric Urology Research Fund.  
485 LC acknowledges support from the National Science Foundation CAREER Award  
486 1453247. SHW is a recipient of a NSF Predoctoral Fellowship.

487

#### 488 **Author Contributions**

489 CJB, ARE, and MH conceived the study, performed the experiments, analyzed the data,  
490 and composed the manuscript. SAR performed the nitrosative and oxidative stress  
491 assays. MJF and MMH constructed deletion mutants and complementation constructs  
492 under the supervision of CJB and ARE. JRB assisted with imaging data acquisition. SD  
493 and DBC performed the animal experiments along with CJB and ARE, assisted in data

494 analysis, and edited the manuscript. SHW and LC performed the extracellular matrix  
495 component measurements and edited the manuscript.

496

#### 497 **Declaration of Interests**

498 The authors declare no conflicts of interest at the time of submission of this manuscript.

499

#### 500 **References**

- 501 1. Kostakioti M, Hadjifrangiskou M, Hultgren SJ. 2013. Bacterial biofilms:  
502 development, dispersal, and therapeutic strategies in the dawn of the  
503 postantibiotic era. *Cold Spring Harb Perspect Med* 3:a010306.
- 504 2. Stewart P, Franklin M. 2008. Physiological heterogeneity in biofilms, *Nature*  
505 *Reviews Microbiology*.
- 506 3. Nadell CD, Drescher K, Foster KR. 2016. Spatial structure, cooperation and  
507 competition in biofilms. *Nat Rev Microbiol* 14:589-600.
- 508 4. Stewart PS, Franklin MJ. 2008. Physiological heterogeneity in biofilms. *Nat Rev*  
509 *Microbiol* 6:199-210.
- 510 5. Vlamakis H, Aguilar C, Losick R, Kolter R. 2008. Control of cell fate by the  
511 formation of an architecturally complex bacterial community. *Genes Dev* 22:945-  
512 53.
- 513 6. van Gestel J, Vlamakis H, Kolter R. 2015. Division of Labor in Biofilms: the  
514 Ecology of Cell Differentiation. *Microbiol Spectr* 3:MB-0002-2014.

- 515 7. Dragoš A, Kiesevalter H, Martin M, Hsu CY, Hartmann R, Wechsler T, Eriksen  
516 C, Brix S, Drescher K, Stanley-Wall N, Kümmerli R, Kovács Á. 2018. Division of  
517 Labor during Biofilm Matrix Production. *Curr Biol* 28:1903-1913.e5.
- 518 8. Dietrich LE, Okegbe C, Price-Whelan A, Sakhtah H, Hunter RC, Newman DK.  
519 2013. Bacterial community morphogenesis is intimately linked to the intracellular  
520 redox state. *J Bacteriol* 195:1371-80.
- 521 9. DePas WH, Hufnagel DA, Lee JS, Blanco LP, Bernstein HC, Fisher ST, James  
522 GA, Stewart PS, Chapman MR. 2013. Iron induces bimodal population  
523 development by *Escherichia coli*. *Proc Natl Acad Sci U S A* 110:2629-34.
- 524 10. Floyd KA, Moore JL, Eberly AR, Good JA, Shaffer CL, Zaver H, Almqvist F,  
525 Skaar EP, Caprioli RM, Hadjifrangiskou M. 2015. Adhesive fiber stratification in  
526 uropathogenic *Escherichia coli* biofilms unveils oxygen-mediated control of type 1  
527 pili. *PLoS Pathog* 11:e1004697.
- 528 11. Jo J, Cortez KL, Cornell WC, Price-Whelan A, Dietrich LE. 2017. An orphan *cbb*<sub>3</sub>-  
529 type cytochrome oxidase subunit supports *Pseudomonas aeruginosa* biofilm  
530 growth and virulence. *Elife* 6.
- 531 12. Uden G, Bongaerts J. 1997. Alternative respiratory pathways of *Escherichia*  
532 *coli*: energetics and transcriptional regulation in response to electron acceptors.  
533 *Biochim Biophys Acta* 1320:217-34.
- 534 13. Borisov VB, Verkhovsky MI. 2015. Oxygen as Acceptor. *EcoSal Plus* 6.
- 535 14. Borisov VB, Gennis RB, Hemp J, Verkhovsky MI. 2011. The cytochrome bd  
536 respiratory oxygen reductases. *Biochim Biophys Acta* 1807:1398-413.



- 537 15. Morris RL, Schmidt TM. 2013. Shallow breathing: bacterial life at low O<sub>2</sub>. Nat  
538 Rev Microbiol 11:205-12.
- 539 16. Liu J, Prindle A, Humphries J, Gabalda-Sagarra M, Asally M, Lee DY, Ly S,  
540 Garcia-Ojalvo J, Süel GM. 2015. Metabolic co-dependence gives rise to  
541 collective oscillations within biofilms. Nature 523:550-4.
- 542 17. Cegelski L, Pinkner JS, Hammer ND, Cusumano CK, Hung CS, Chorell E, Aberg  
543 V, Walker JN, Seed PC, Almqvist F, Chapman MR, Hultgren SJ. 2009. Small-  
544 molecule inhibitors target Escherichia coli amyloid biogenesis and biofilm  
545 formation. Nat Chem Biol 5:913-9.
- 546 18. Jurgisek JA, Brockman KL, Novotny LA, Goodman SD, Bakaletz LO. 2017.  
547 Nontypeable. Proc Natl Acad Sci U S A 114:E6632-E6641.
- 548 19. Rapsinski GJ, Wynosky-Dolfi MA, Opong GO, Tursi SA, Wilson RP, Brodsky IE,  
549 Tükel Ç. 2015. Toll-like receptor 2 and NLRP3 cooperate to recognize a  
550 functional bacterial amyloid, curli. Infect Immun 83:693-701.
- 551 20. McCrate OA, Zhou X, Reichhardt C, Cegelski L. 2013. Sum of the parts:  
552 composition and architecture of the bacterial extracellular matrix. J Mol Biol  
553 425:4286-94.
- 554 21. Thongsomboon W, Serra DO, Possling A, Hadjineophytou C, Hengge R,  
555 Cegelski L. 2018. Phosphoethanolamine cellulose: A naturally produced  
556 chemically modified cellulose. Science 359:334-338.
- 557 22. Hufnagel DA, Depas WH, Chapman MR. 2015. The Biology of the Escherichia  
558 coli Extracellular Matrix. Microbiol Spectr 3.

- 559 23. Hogley L, Ostrowski A, Rao FV, Bromley KM, Porter M, Prescott AR, MacPhee  
560 CE, van Aalten DM, Stanley-Wall NR. 2013. BslA is a self-assembling bacterial  
561 hydrophobin that coats the *Bacillus subtilis* biofilm. *Proc Natl Acad Sci U S A*  
562 110:13600-5.
- 563 24. Asally M, Kittisopikul M, Rué P, Du Y, Hu Z, Çağatay T, Robinson AB, Lu H,  
564 Garcia-Ojalvo J, Süel GM. 2012. Localized cell death focuses mechanical forces  
565 during 3D patterning in a biofilm. *Proc Natl Acad Sci U S A* 109:18891-6.
- 566 25. Cutruzzolà F, Frankenberg-Dinkel N. 2016. Origin and Impact of Nitric Oxide in  
567 *Pseudomonas aeruginosa* Biofilms. *J Bacteriol* 198:55-65.
- 568 26. Giuffrè A, Borisov VB, Arese M, Sarti P, Forte E. 2014. Cytochrome bd oxidase  
569 and bacterial tolerance to oxidative and nitrosative stress. *Biochim Biophys Acta*  
570 1837:1178-87.
- 571 27. Mason MG, Shepherd M, Nicholls P, Dobbin PS, Dodsworth KS, Poole RK,  
572 Cooper CE. 2009. Cytochrome bd confers nitric oxide resistance to *Escherichia*  
573 *coli*. *Nat Chem Biol* 5:94-6.
- 574 28. Shepherd M, Achard ME, Idris A, Totsika M, Phan MD, Peters KM, Sarkar S,  
575 Ribeiro CA, Holyoake LV, Ladakis D, Ulett GC, Sweet MJ, Poole RK, McEwan  
576 AG, Schembri MA. 2016. The cytochrome bd-I respiratory oxidase augments  
577 survival of multidrug-resistant *Escherichia coli* during infection. *Sci Rep* 6:35285.
- 578 29. Borisov VB, Forte E, Davletshin A, Mastronicola D, Sarti P, Giuffrè A. 2013.  
579 Cytochrome bd oxidase from *Escherichia coli* displays high catalase activity: an  
580 additional defense against oxidative stress. *FEBS Lett* 587:2214-8.

- 581 30. Safarian S, Rajendran C, Müller H, Preu J, Langer JD, Ovchinnikov S, Hirose T,  
582 Kusumoto T, Sakamoto J, Michel H. 2016. Structure of a bd oxidase indicates  
583 similar mechanisms for membrane-integrated oxygen reductases. *Science*  
584 352:583-6.
- 585 31. Wang ZJ, Joe BN, Coakley FV, Zaharchuk G, Busse R, Yeh BM. 2008. Urinary  
586 oxygen tension measurement in humans using magnetic resonance imaging.  
587 *Acad Radiol* 15:1467-73.
- 588 32. Flores-Mireles AL, Walker JN, Caparon M, Hultgren SJ. 2015. Urinary tract  
589 infections: epidemiology, mechanisms of infection and treatment options. *Nat*  
590 *Rev Microbiol* 13:269-84.
- 591 33. Hadjifrangiskou M, Kostakioti M, Chen SL, Henderson JP, Greene SE, Hultgren  
592 SJ. 2011. A central metabolic circuit controlled by QseC in pathogenic  
593 *Escherichia coli*. *Mol Microbiol* 80:1516-29.
- 594 34. Floyd KA, Mitchell CA, Eberly AR, Colling SJ, Zhang EW, DePas W, Chapman  
595 MR, Conover M, Rogers BR, Hultgren SJ, Hadjifrangiskou M. 2016. The Ubil  
596 (VisC) Aerobic Ubiquinone Synthase Is Required for Expression of Type 1 Pili,  
597 Biofilm Formation, and Pathogenesis in Uropathogenic *Escherichia coli*. *J*  
598 *Bacteriol* 198:2662-72.
- 599 35. Alteri CJ, Smith SN, Mobley HL. 2009. Fitness of *Escherichia coli* during urinary  
600 tract infection requires gluconeogenesis and the TCA cycle. *PLoS Pathog*  
601 5:e1000448.
- 602 36. Eberly AR, Floyd KA, Beebout CJ, Colling SJ, Fitzgerald MJ, Stratton CW,  
603 Schmitz JE, Hadjifrangiskou M. 2017. Biofilm Formation by Uropathogenic

- 604           Escherichia coli Is Favored under Oxygen Conditions That Mimic the Bladder  
605           Environment. *Int J Mol Sci* 18.
- 606   37.   Barraud N, Schleheck D, Klebensberger J, Webb JS, Hassett DJ, Rice SA,  
607           Kjelleberg S. 2009. Nitric oxide signaling in *Pseudomonas aeruginosa* biofilms  
608           mediates phosphodiesterase activity, decreased cyclic di-GMP levels, and  
609           enhanced dispersal. *J Bacteriol* 191:7333-42.
- 610   38.   Hengge R. 2009. Principles of c-di-GMP signalling in bacteria. *Nat Rev Microbiol*  
611           7:263-73.
- 612   39.   Mulvey MA, Schilling JD, Hultgren SJ. 2001. Establishment of a persistent  
613           *Escherichia coli* reservoir during the acute phase of a bladder infection. *Infect*  
614           *Immun* 69:4572-9.
- 615   40.   Murphy KC, Campellone KG. 2003. Lambda Red-mediated recombinogenic  
616           engineering of enterohemorrhagic and enteropathogenic *E. coli*. *BMC Mol Biol*  
617           4:11.
- 618   41.   Shaffer CL, Zhang EW, Dudley AG, Dixon BR, Guckes KR, Breland EJ, Floyd  
619           KA, Casella DP, Algood HM, Clayton DB, Hadjifrangiskou M. 2017. Purine  
620           Biosynthesis Metabolically Constrains Intracellular Survival of Uropathogenic  
621           *Escherichia coli*. *Infect Immun* 85.
- 622   42.   Pfaffl MW. 2001. A new mathematical model for relative quantification in real-  
623           time RT-PCR. *Nucleic Acids Res* 29:e45.
- 624   43.   Almeida C, Azevedo NF, Santos S, Keevil CW, Vieira MJ. 2011. Discriminating  
625           multi-species populations in biofilms with peptide nucleic acid fluorescence in situ  
626           hybridization (PNA FISH). *PLoS One* 6:e14786.

627 44. Hung CS, Dodson KW, Hultgren SJ. 2009. A murine model of urinary tract  
628 infection. Nat Protoc 4:1230-43.

629

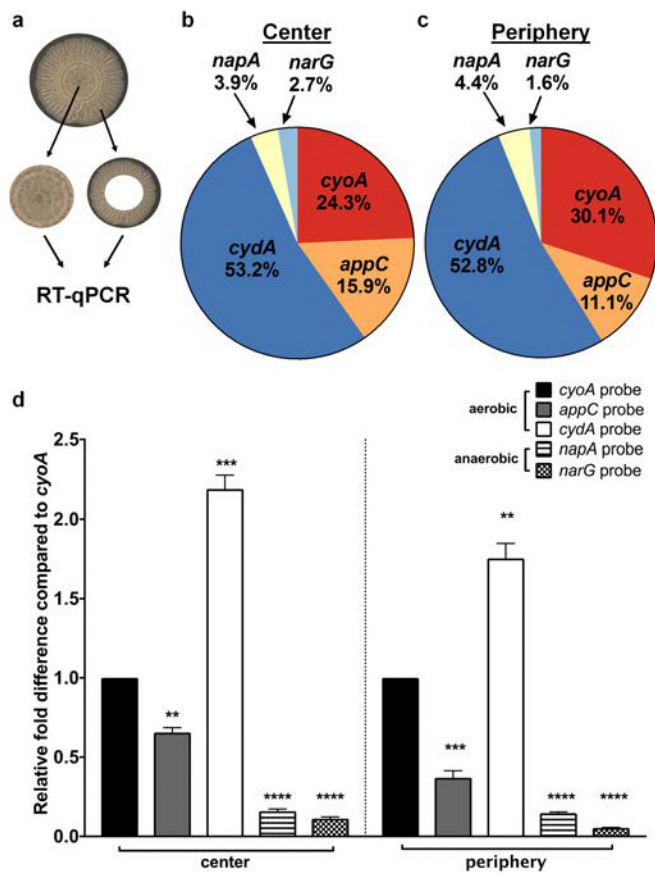

**Figure 1: Lateral expression of respiratory complexes in *Escherichia coli* biofilms:** **a**, Image of a mature colony biofilm formed by UPEC strain UT189 on YESCA agar. The center and periphery of colony biofilms were harvested and subjected to RNA extraction and RT-qPCR using the following probes: *cydA*, *cyoA*, *appC*, *napA*, and *narG* with *gyrB* as a normalizer. **b – c**, Pie charts indicating the relative abundance of detected respiratory transcripts in the biofilm center (**b**) and periphery (**c**). **d**, Graphs depicting relative fold differences in transcript abundance in the biofilm center and periphery. The graph and pie chart depict the average of 4 biological replicates. Statistical analysis was performed in GraphPad Prism using a two-tailed paired t test. Data are presented as mean  $\pm$  SEM. \* =  $p < 0.05$ , \*\* =  $p < 0.01$ , \*\*\* =  $p < 0.001$ , \*\*\*\* =  $p < 0.0001$ .

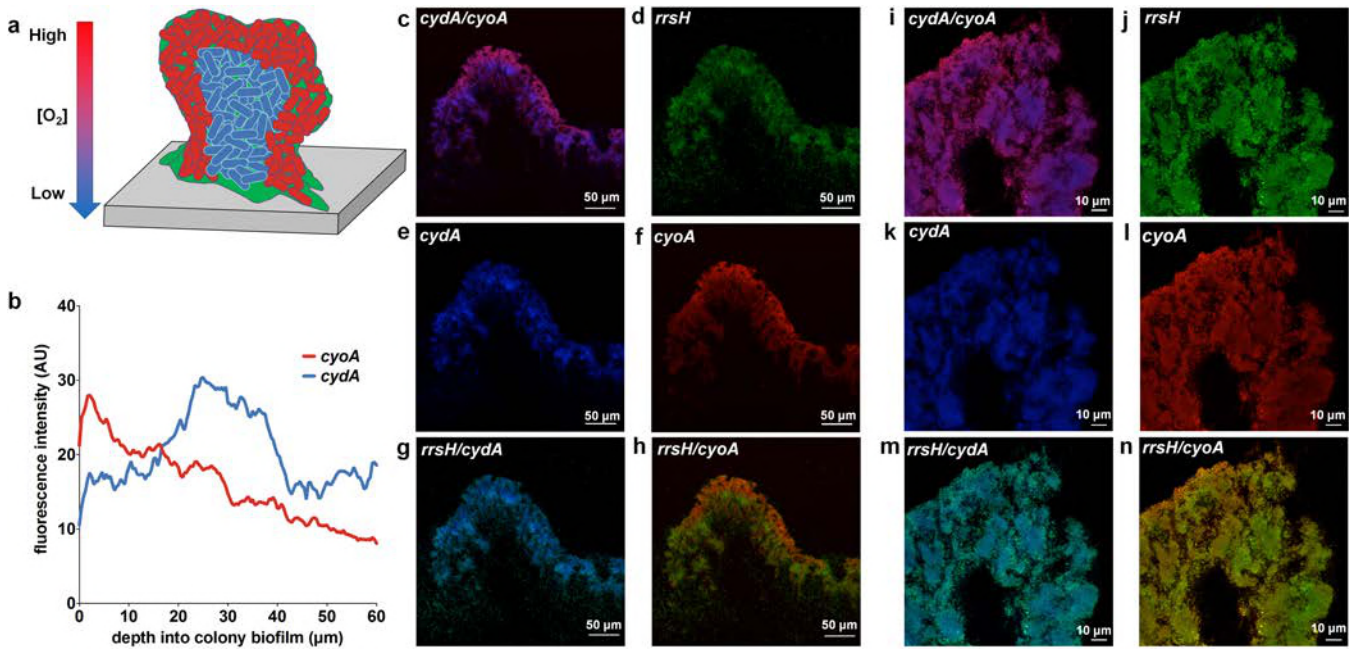

**Figure 2: Expression of cytochrome oxidases as a function of the oxygen gradient.** **a**, Cartoon depicting the detected localization of *cyoA* (red) and *cydA* (blue) transcripts in biofilm cryosections. **b**, Fluorescence intensity of *cyoA* and *cydA* PNA-FISH probes were quantified on ImageJ. Data are presented as the average fluorescence intensity as a function of depth obtained from four images, each with five measurements per image. **c – n**, Representative images of PNA-FISH stained biofilm cryosections at 20x magnification (**c – h**) and 63x magnification (**i – n**). Cryosections were stained with PNA-FISH probes targeting *cyoA* and *cydA* with *rrsH* (16S rRNA) as an endogenous control. Images are representative of three biological replicates.

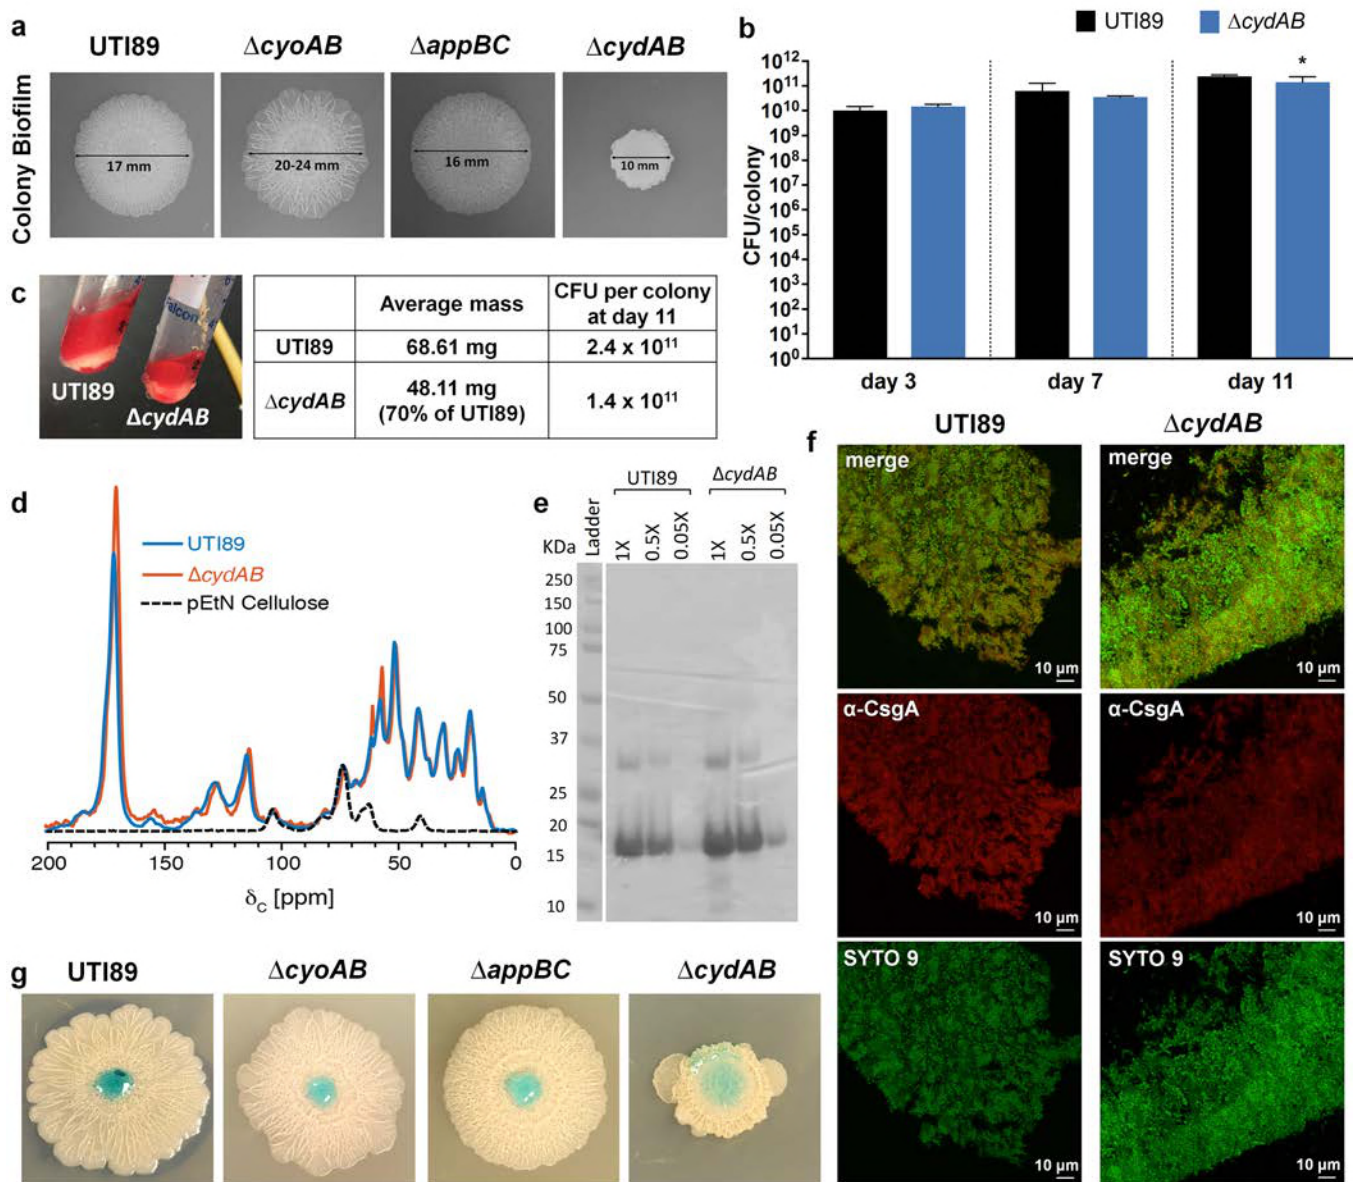

**Figure 3. Cytochrome *bd* organizes biofilm architecture and ECM production.** **a**, Colony biofilms of UTI89 and cytochrome oxidase mutants grown on YESCA agar for 11 days. Images are representative of at least 30 biological replicates. **b**, CFU per colony biofilm was measured at days 3, 7, and 11 of growth. Statistical analysis was performed in GraphPad Prism using a two-tailed unpaired t test. \* =  $p < 0.05$ . Data are presented as mean  $\pm$  SD. Data are representative of five biological replicates. **c**, **left**, Image depicting gross changes to extracellular matrix (ECM) abundance between UTI89 and  $\Delta cydAB$  colony biofilms. ECM is stained red by the presence of Congo Red in the growth medium. **right**, Table lists average mass and CFU per colony biofilm after 11 days of growth. Average mass is from a pooled analysis of 186 individual colonies. CFU per colony is the average of five biological replicates. **d**, Solid-state NMR spectra of the ECM of UTI89 (blue),  $\Delta cydAB$  (orange), and isolated pEtN cellulose (black). **e**, SDS-PAGE gel of UTI89 and  $\Delta cydAB$  ECM. **f**, Immunofluorescence images of curli ( $\alpha$ -CsgA, red) localization in UTI89 and  $\Delta cydAB$  colony biofilm cryosections. **g**, Colored water droplets were added to the top of day 11 colony biofilms to probe biofilm barrier function.



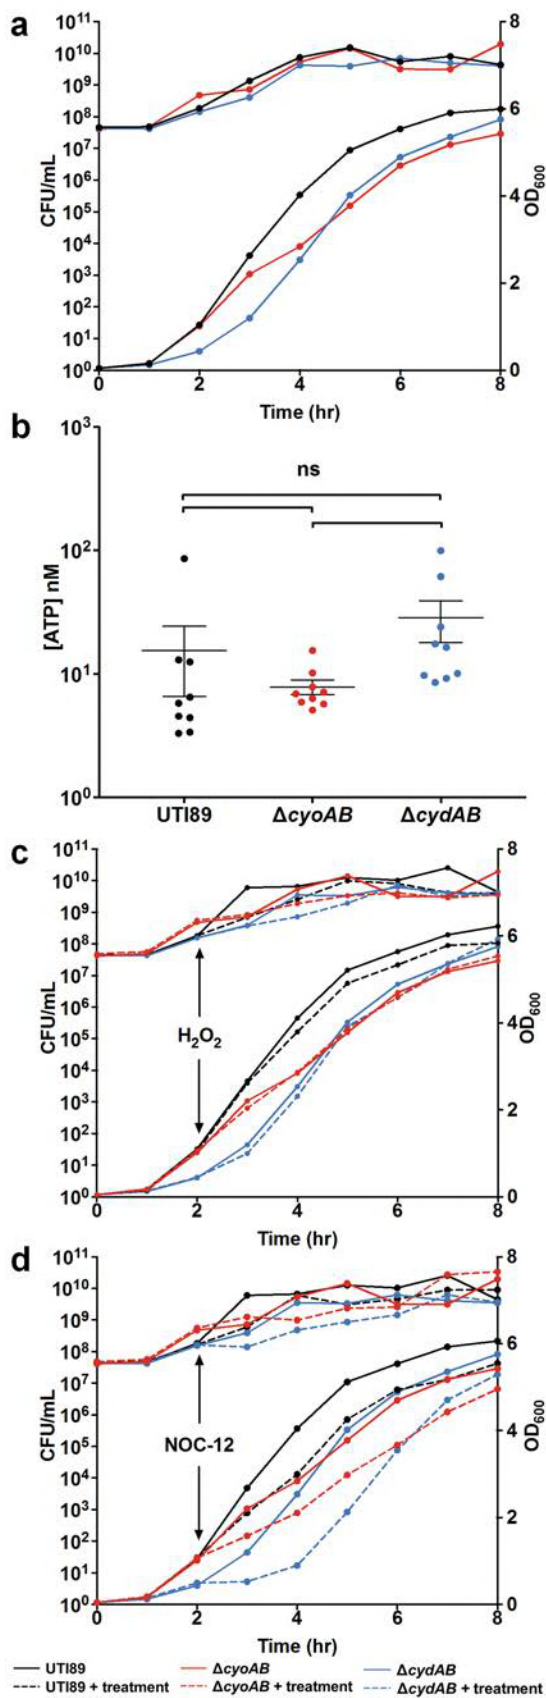

**Figure 4: Cytochrome *bd* provides nitrosative stress resistance.** **a**, Growth curves for UTI89,  $\Delta cyoAB$ , and  $\Delta cydAB$  as measured by CFU per mL (upper lines, left axis) and OD<sub>600</sub> (lower lines, right axis). **b**, ATP levels measured from logarithmic cultures of UTI89,  $\Delta cyoAB$ , and  $\Delta cydAB$ . Statistical analysis was performed on GraphPad Prism using a two-tailed unpaired t test. Data are presented as mean  $\pm$  SEM. **c – d**, Growth curves for UTI89,  $\Delta cyoAB$ , and  $\Delta cydAB$  as measured by CFU per mL (upper lines, left axis) and OD<sub>600</sub> (lower lines, right axis). 0.5 mM of nitric oxide donor NOC-12 (**c**) or 1 mM hydrogen peroxide (**d**) was added at t = 2 hours. All data are representative of at least three biological replicates.

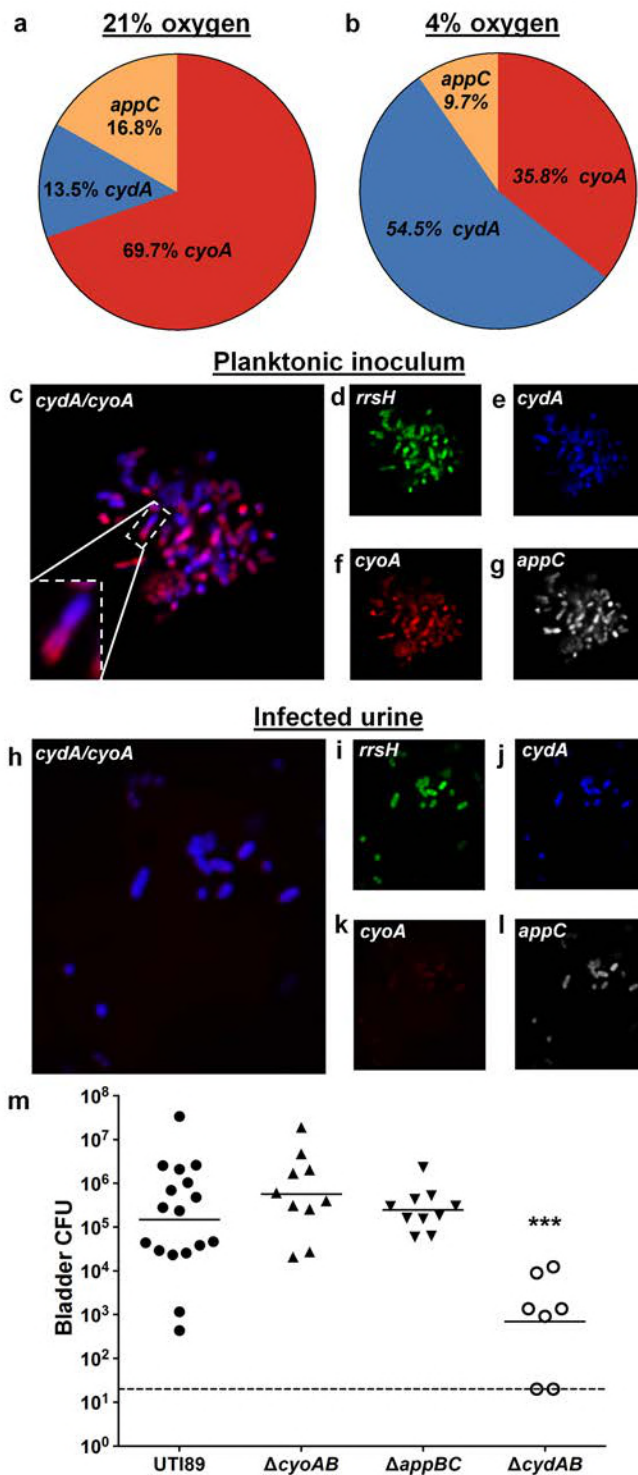

**Figure 5: Respiratory heterogeneity provides a fitness advantage during urinary tract infection.** **a – b**, Pie charts depicting relative abundance of *cydA*, *cyoA*, and *appC* transcripts detected using RT-qPCR in planktonic cultures grown at 21% oxygen in the manner used to prepare cultures to inoculate mice (**a**), as well as planktonic cultures grown at 4% oxygen (**b**). Data is representative of three biological replicates. **c – g**, PNA-FISH was used to detect cytochrome oxidase transcripts from cultures used to inoculate mice. Data is representative of three biological replicates. **h – l**, PNA-FISH was used to detect cytochrome oxidase transcripts in the urine of mice infected with UTI89. Urine was pooled from 20 mice. **m**, Graph depicting bladder titers obtained from mice infected with UTI89 or cytochrome oxidase mutant strains at 24 hours post infection. Each point represents a mouse. UTI89 and  $\Delta cydAB$  are representative of two independent experiments.  $\Delta cyoAB$  and  $\Delta appBC$  are representative of one experiment. Statistical analysis was performed in GraphPad Prism using a two-tailed Mann-Whitney test. Line represents geometric mean. \*\*\* =  $p < 0.001$ .

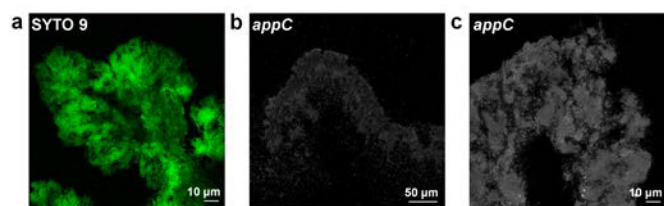

**Figure S1: Localization of *appC* transcript in biofilm cryosections.** **a**, Representative image of SYTO 9 stained biofilm cryosection at 20x magnification. **b – c**, Representative images of biofilm cryosections stained with an *appC* PNA-FISH probe at 20x (**b**) and 63x (**c**) magnification.

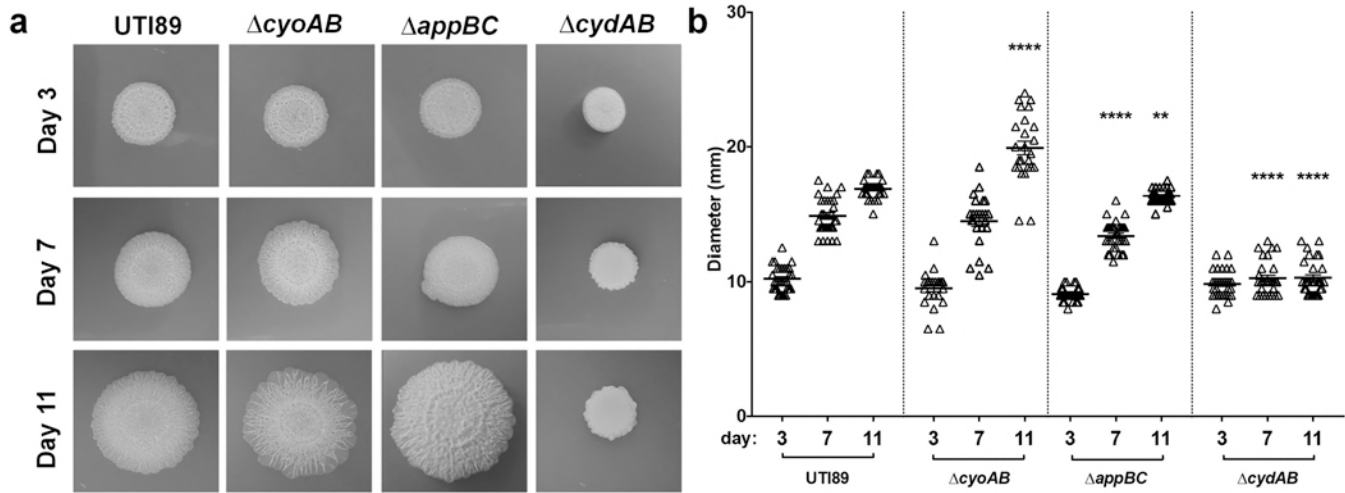

**Figure S2: Temporal development of colony biofilms by UTI89 and isogenic cytochrome oxidase mutants.** **a**, Representative images of UTI89 and cytochrome oxidase mutant colony biofilms grown on YESCA agar taken on day 3, 7, and 11 of growth. **b**, Graph depicting colony biofilm diameter at day 3, 7, and 11 of growth. Each triangle represents an individual colony biofilm. Data is representative of at least 30 biological replicates. Statistical analysis was performed in GraphPad Prism using Welch's t test. \* =  $p < 0.05$ , \*\* =  $p < 0.01$ , \*\*\* =  $p < 0.001$ , \*\*\*\* =  $p < 0.0001$ .

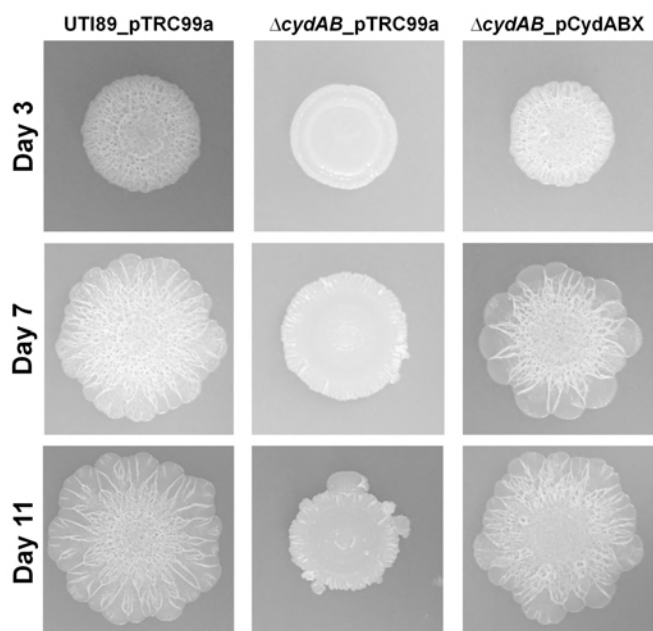

**Figure S3: Extrachromosomal complementation of  $\Delta cydAB$  rescues biofilm defects.** Representative images on UT189\_pTRC99a,  $\Delta cydAB$ \_pTRC99a, and complemented  $\Delta cydAB$ \_pCydABX under the control of a native promoter. Images were taken of colony biofilms grown on YESCA agar at days 3, 7, and 11 of growth. Images are representative of at least 5 biological replicates.

**Supplemental Movies S1-4: Cytochrome *bd* influences matrix hydrophobicity and resistance to penetration by aqueous solutions.** Videos of colored water applied adjacent to a day 11 colony biofilm to assess the degree to which colony biofilms uptake aqueous solutions. **Movie S1**, UTI89; **Movie S2**,  $\Delta cyoAB$ ; **Movie S3**,  $\Delta appBC$ ; **Movie S4**,  $\Delta cydAB$ . Videos are representative of at least 5 biological replicates.

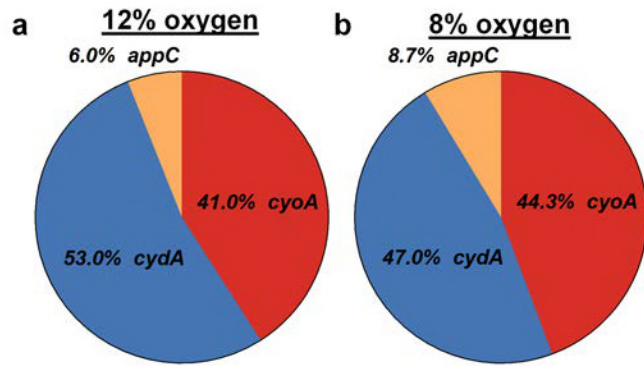

**Figure S4: Ambient oxygen concentration influences cytochrome oxidase transcript abundance.** Pie charts depicting relative abundance of *cydA*, *cyoA*, and *appC* transcripts detected using RT-qPCR in planktonic cultures grown at 12% (a) or 8% oxygen (b). Data is representative of three biological replicates.

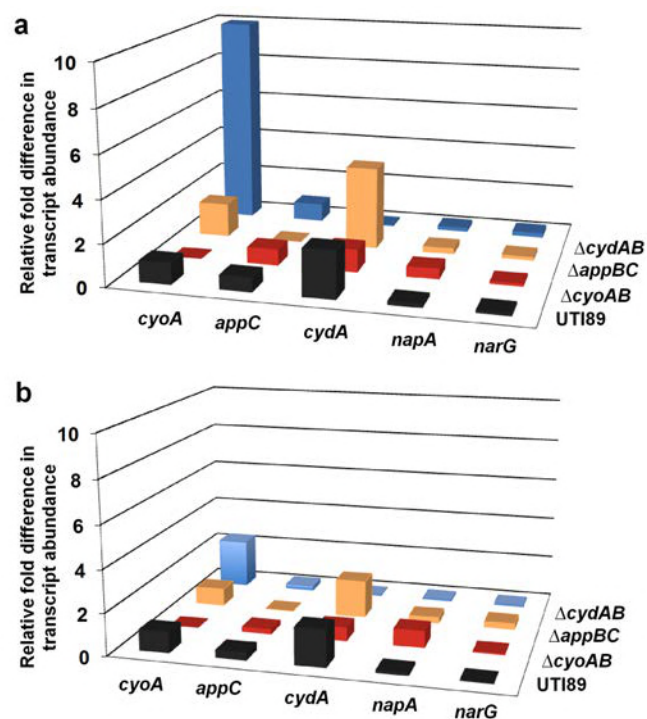

**Figure S5: Expression of respiratory complexes in colony biofilms of cytochrome oxidase deletion mutants.** RT-qPCR data depicting relative fold difference in respiratory transcript abundance in the center (a) and periphery (b) of day 11 colony biofilms across cytochrome oxidase mutant strains. In UTI89 (black), data is presented as relative fold difference in transcript abundance as compared to *cyoA* abundance. In each mutant strain, data is presented as relative fold difference in transcript abundance as compared to transcript abundance in UTI89.



**Table S1: Primers and probes**

| <b>Primer/Probe</b> | <b>Sequence (5' → 3')</b>                                                         | <b>Purpose</b>                |
|---------------------|-----------------------------------------------------------------------------------|-------------------------------|
| cydA_KO_Fwd         | ATGATGTTAGATATAGTCGAACTGTGCGCCTTACAGTTT<br>GCCTTGACCGCGATGTACGTGTAGGCTGGAGCTGCTTC | <i>cydAB</i> knockout         |
| cydB_KO_Rev         | GTTACGTTCAATATCTTCTTTGGTGATACGACCGAACATT<br>TTCCAGTCATATGAATATCCTCCTTAG           | <i>cydAB</i> knockout         |
| cydA_KO_Test_Fwd    | GATCAAATTGGTGAGATCGTGAC                                                           | <i>cydAB</i> knockout         |
| cydB_KO_Test_Rev    | CTAACAGAAGTGCCATCAGC                                                              | <i>cydAB</i> knockout         |
| cydA1_Fwd_XbaI      | CTGCAGTCTAGACTGGTCAAGTTATCCATCATTCACT                                             | <i>cydABX</i> complementation |
| cydX_Rev_SacI       | CGTATTGAGCTC/TTGCGATAATCTTACTCATCAGATGTC                                          | <i>cydABX</i> complementation |
| appC_KO_Fwd         | ATGTGGGATGTCATTGATTTATCGCGCTGGCAGTTTGCT<br>CTGACCGCGGTGTAGGCTGGAGCTGCTTC          | <i>appBC</i> knockout         |
| appB_KO_Rev         | TTAGTACAGCTCGTTTTTCGTTACGGCGGAGAGTTTCTGT<br>CGTCATGCCATATGAATATCCTCCTTAG          | <i>appBC</i> knockout         |
| appC_KO_Test_Fwd    | ACGCAGACGTCACGGCG                                                                 | <i>appBC</i> knockout         |
| appB_KO_Test_Rev    | TGCACAGTCAGGTGCCAGC                                                               | <i>appBC</i> knockout         |
| cyoB_KO_Fwd         | TCAGTTGCCATTTTTTCAGCCCTGCCTTAGTAATCTCATC<br>GGTGTAGGCTGGAGCTGCTTC                 | <i>cyoAB</i> knockout         |
| cyoA_KO_Rev         | GTCATTATTTGCAGGCACTGTATTGCTCAGTGGCTGTAA<br>TTCTGCGCTGCATATGAATATCCTCCTTAG         | <i>cyoAB</i> knockout         |
| cyoB_KO_Test_Fwd    | CATCCAGATAAGACCGGAAGTG                                                            | <i>cyoAB</i> knockout         |
| cyoA_KO_Test_Rev    | GCAACATATGTGACCTGATAGC                                                            | <i>cyoAB</i> knockout         |
| cyoA_Fwd            | CAATGCCCTGTTCCGGGTAGATG                                                           | qPCR                          |
| cyoA_Rev            | ACGGTACCTATCTTAATCATCATCTTCC                                                      | qPCR                          |
| cyoA probe          | NED-TCGTCGTGTGCCAGCGGCTTG                                                         | qPCR                          |
| appC_Fwd            | CGATGTGCGATTACGCTCG                                                               | qPCR                          |
| appC_Rev            | GGTGCAGGTTCTGTTTGCCACT                                                            | qPCR                          |
| appC probe          | NED-CTGCGTATGAAGTCGCGCAAG                                                         | qPCR                          |
| cydA_Fwd            | GTGGCTACCGGTCTGACCATG                                                             | qPCR                          |
| cydA_Rev            | CCAACCGAAGAAGAACAGACCTAC                                                          | qPCR                          |
| cydA probe          | FAM-CGCTGGCAATCGAAGGTCTGATG                                                       | qPCR                          |
| narG_Fwd            | TCTCGCTATACTGGACACCTGA                                                            | qPCR                          |
| narG_Rev            | CCGTATAGTCCACCGGATTCAT                                                            | qPCR                          |
| narG probe          | NED-TGCCGTCTGCGCCGAGT                                                             | qPCR                          |
| napA_Fwd            | CTTCCGCGTGTGGTACTGC                                                               | qPCR                          |
| napA_Rev            | GTGCCGCTCGGGATATTCC                                                               | qPCR                          |
| napA probe          | FAM-CGTCTGCCTGCGGACATGGTGGTGAC                                                    | qPCR                          |
| gyrB_Fwd            | GATGCGCGTGAAGGCCTGATTG                                                            | qPCR                          |
| gyrB_Rev            | CACGGGCACGGGCAGCATC                                                               | qPCR                          |
| gyrB probe          | VIC-ACGAACTGCTGGCGGA                                                              | qPCR                          |
| cyoA PNA            | CGTCGTGTGCCA – Lys (Atto425)                                                      | PNA-FISH                      |
| cydA PNA            | CGATTGCCAGCG – Lys (Cy5)                                                          | PNA-FISH                      |
| appC PNA            | TGCGCGACTTCATA – Lys (TexasRed)                                                   | PNA-FISH                      |
| rrsH PNA            | AGTAATTCCGATTAACG – Lys (Atto532)                                                 | PNA-FISH                      |
